# Supplementary material for: Identification of active miRNA and transcription factor regulatory pathways in human obesity-related inflammation
Source: PubMed Central journal article supplement (PMC4355475; doi:10.1186/s12859-015-0512-5), 2015-03-07
Supplement: 12859_2015_512_MOESM1_ESM.pdf [file 12859_2015_512_MOESM1_ESM.pdf]

**Table S1.** Obesity-related mRNA expression profiles in adipocytes of obese humans

| GEO accession | The body region                            | Platform | Total samples | Obese samples | Lean samples |
|---------------|--------------------------------------------|----------|---------------|---------------|--------------|
| GSE2508       | Isolated abdominal subcutaneous adipocytes | GPL570   | 39            | 19            | 20           |

For mRNA expression profile, 20 lean and 19 obese subjects were hybridized individually to Affymetrix oligonucleotide arrays HG-U95A, B, C, D, and E 6 platforms. In each platform, probe sets were mapped to Entrez Gene IDs. We averaged the expression values of the probe sets which corresponded to the same gene. The differentially expressed genes were detected using Significance Analysis of Microarrays (SAM) approach, and false discovery rate (FDR) was used to correct for multiple testing. The genes which were differentially expressed in all of 6 platforms were considered in the analysis.

#### References

Lee YH, Nair S, Rousseau E, Allison DB, Page GP, Tataranni PA, Bogardus C and Permana PA, *Diabetologia*, 2005, **48**, 1776-1783.
