# Supplementary material for: Identification of active miRNA and transcription factor regulatory pathways in human obesity-related inflammation
Source: PubMed Central journal article supplement (PMC4355475; doi:10.1186/s12859-015-0512-5), 2015-03-07
Supplement: 12859_2015_512_MOESM2_ESM.pdf [file 12859_2015_512_MOESM2_ESM.pdf]

**Table S2.** Obesity-related miRNA expression profiles in human adipose tissue

| GEO accession | The body region                   | Platform | Total samples | Obese without Type 2 Diabetes Mellitus samples | Obese with Type 2 Diabetes Mellitus samples | Lean samples |
|---------------|-----------------------------------|----------|---------------|------------------------------------------------|---------------------------------------------|--------------|
| GSE18470      | human subcutaneous adipose tissue | GPL7731  | 28            | 13                                             | 9                                           | 6            |

For miRNA expression profile, we filtered out samples with Type 2 Diabetes Mellitus. Then 6 lean and 13 obese samples were kept for the further analysis. The differentially expressed miRNAs were detected using SAM.

#### References

Hummel M, Ferrer A, Rodriguez-Hermosa JI, Ruiz B, Ricart W, Peral B and Fernández-Real JM, *PLoS One*, 2010, **5**, e9022.
